# Supplementary material for: A deconvolution framework that uses single-cell sequencing plus a small benchmark data set for accurate analysis of cell type ratios in complex tissue samples
Source: HighWire-hosted journal article supplement (doi:10.1101/gr.278822.123), 2024-11-25
Supplement: Supplemental_Tables.xlsx [file Supplemental_Tables.xlsx]

## Sheet: Content
Supplementary Table 1: Sample information for the retina benchmark dataset.
Supplementary Table 2: Cell annotation markers.
Supplementary Table 3: Proportion of major cell types in healthy human retina.
Please click on the sheet name below, such as 'Table_s1', to access each supplementary table.

## Sheet: Table_s1
Supplementary Table 1: Sample information for the retina benchmark dataset.
ID	Donor Number	Gender	Ethnicity	Age of Death	Tissue	Batch no.
1	D013.19	Female	Caucasian	78	Macular	1
2	D014.19	Male	Caucasian	84	Macular	1
3	D015.19	Male	Caucasian	73	Macular	1
4	D016.19	Male	Caucasian	83	Macular	1
5	D003.19	Male	Caucasian	86	Macular	2
6	D007.19	Male	Caucasian	66	Macular	2
7	D005.19	Male	Hispanic	53	Macular	2
8	D006.19	Male	Caucasian	90	Macular	2
9	D008.19	Female	Hispanic	64	Macular	2
10	D009.19	Male	Hispanic	68	Macular	2
11	D010.19	Female	Caucasian	88	Macular	2
12	D011.19	Female	Caucasian	90	Macular	2
13	D019.19	Female	Caucasian	82	Macular	2
14	D005.13	Male	Caucasian	80	Macular	2
15	D009.13	Male	Asian	85	Macular	2
16	D013.13	Male	Caucasian	69	Macular	2
17	D017.13	Male	Caucasian	65	Macular	2
18	D018.13	Female	Caucasian	82	Macular	2
19	D019.13	Male	Caucasian	82	Macular	2
20	D021.13	Male	Caucasian	86	Macular	2
21	D026.13	Male	Caucasian	81	Macular	2
22	D027.13	Male	Caucasian	77	Macular	2
23	D028.13	Male	Caucasian	67	Macular	2
24	D030.13	Female	Caucasian	73	Macular	2

## Sheet: Table_s2
Supplementary Table 2: Cell annotation markers.
Cell type	Marker genes
Seven major cell types in retina tissue
Amacrine cells	PAX6, GAD1/2, SLC6A1, ATP1B1
Bipolar cells	VSX2, ISL1, GRM6, OTX2, TRPM1
Cone cells	ARR3, GUCA1C, PDE6C, OPN1LW
Horizontal cells	ONECUT1, TPM3, NDRG1
Muller cells	RLBP1, HES1, SLC1A3, GLUL, GLU
Retina ganglion cells	NEFL, RBPMS, TUBB3, POU4F1, SLC17A6
Rod cells	PDE6A, SLC24A1, RHO, CNGB1, GNAT1
Three minor cell types in retina tissue
Astrocyte	GFAP, S100B, SOX9, PAX2
Microglia	P2RY12, CD63, CD68, CD11B
Retina pigmental epithelium	PAX6, BEST1, ID3

## Sheet: Table_s3
Supplementary Table 3: Mean proportions of major cell types in healthy human retina (n=105).
Cell type	Cell type proportion (%)
	Human peripheral retina (Adapted from Liang et al., 2019)	DeMixSC	MuSiC2	CIBERSORTx	SQUID	DeMixSC + no alignment	DeMixSC + Limma	DeMixSC + VSN
ACs	7.74	2.26	0.84	0.02	12.06	0	0.98	11.59
BCs	15.6	17.69	0.21	7.06	4.03	1.96	19.32	4.06
Cones	4.61	3.43	0.01	3.55	24.31	0	1.03	8.75
HCs	3.61	7.64	2.24	1.46	0.85	3.65	8.04	11.07
MGs	14.08	7.74	3.25	10.38	1.85	10.18	9.34	3.86
RGCs	1.07	3.2	0.08	0	6.9	0	4.13	22.99
Rods	53.29	51.78	74.95	72.64	4.47	66.13	45.92	10.54
RMSE		0.04	0.16	0.1	0.24	0.12	0.05	0.2
Spearman's correlation		0.75	0.57	0.86	-0.14	0.57	0.68	-0.61
